# Supplementary material for: Barriers and opportunities for implementation of a brief psychological intervention for post-ICU mental distress in the primary care setting – results from a qualitative sub-study of the PICTURE trial
Source: Springer Nature journal article supplement (doi:10.1186/s12875-023-02046-0), 2023-05-06
Supplement: MOESM2 [file 25327648]

## Interview Guideline

| Main question a)                                                                                                                          | Storytelling prompt                                                                                                                                                                                                                                          | Definition of the leading question, check: was this mentioned?                                                                                                                                                                                                                                                                                                                                                                                                                                                                                                                                                                                                                                                                                                                                                                                                                                                                                    | Concrete Inquiries                                                                                                                                                                                                                                                                                                                                                                                                                                                                                                                                                                                                                                                                                                                                                                                                                                                                                                                                                                                                                                                                                                                                                                                                                                                                                                 |
|-------------------------------------------------------------------------------------------------------------------------------------------|--------------------------------------------------------------------------------------------------------------------------------------------------------------------------------------------------------------------------------------------------------------|---------------------------------------------------------------------------------------------------------------------------------------------------------------------------------------------------------------------------------------------------------------------------------------------------------------------------------------------------------------------------------------------------------------------------------------------------------------------------------------------------------------------------------------------------------------------------------------------------------------------------------------------------------------------------------------------------------------------------------------------------------------------------------------------------------------------------------------------------------------------------------------------------------------------------------------------------|--------------------------------------------------------------------------------------------------------------------------------------------------------------------------------------------------------------------------------------------------------------------------------------------------------------------------------------------------------------------------------------------------------------------------------------------------------------------------------------------------------------------------------------------------------------------------------------------------------------------------------------------------------------------------------------------------------------------------------------------------------------------------------------------------------------------------------------------------------------------------------------------------------------------------------------------------------------------------------------------------------------------------------------------------------------------------------------------------------------------------------------------------------------------------------------------------------------------------------------------------------------------------------------------------------------------|
| <p>Which facilitating and hindering factors are mentioned with regard to <b>the course and implementation of NET in primary care?</b></p> | <p>Did you feel well informed about the content and process of the therapy at the beginning?</p> <p>Please describe to me what talk therapy was like for you. I would like to imagine how it went. Why don't you tell me about it from beginning to end?</p> | <p><b>Prior knowledge, informedness:</b><br/>Expectations, prior knowledge, motivation?</p> <p><b>Formalities:</b></p> <ul style="list-style-type: none"> <li>- Have all sessions taken place? [possibly cross-check with treatment folders].</li> <li>- How much time has passed since completion of NET?</li> </ul> <p><b>Content "objective":</b></p> <ul style="list-style-type: none"> <li>- What was the content of the sessions? [Address first session separately (psychoeducation and lifeline) and only then the other two].</li> <li>- Was possible amnesia addressed during the sessions?</li> </ul> <p><b>Content "subjective."</b></p> <ul style="list-style-type: none"> <li>- How was the contact with the primary physician/ medical assistant felt?</li> <li>- Did mental status change during therapy? Possibly worsened?</li> <li>- Experience of re-experiencing? Intrusion?</li> <li>- Effects on everyday life?</li> </ul> | <p><b>Prior knowledge, informedness:</b></p> <ul style="list-style-type: none"> <li>- What were your expectations for therapy?</li> </ul> <p><b>Formalities:</b></p> <ul style="list-style-type: none"> <li>- How many sessions have you had?</li> <li>- When was the last therapy session?</li> <li>- When and where did the conversations take place: At the end of the consultation? In the regular consultation room?</li> </ul> <p><b>Content "objective":</b></p> <ul style="list-style-type: none"> <li>- How did the session in which you described your life path go?</li> <li>- How did the two sessions go when you recounted your traumatic events?</li> <li>- Was your memory loss/ICU memories addressed during therapy?</li> </ul> <p><b>Content "subjective":</b></p> <ul style="list-style-type: none"> <li>- How did you feel about the sessions?</li> <li>- How did you feel about the contact with primary physician / medical assistant?</li> <li>- Did you notice any change/improvement/deterioration in yourself during therapy? Did it have an impact on your daily life?</li> </ul> <p><b>Enabling and hindering factors</b></p> <ul style="list-style-type: none"> <li>- Do you find it easier to talk about the ICU stay with the primary physician than with a therapist*?</li> </ul> |

|                                                                                                                        |                                                                                                                                                                                                 |                                                                                                                                                                                                                                                                                                                                                                                                                                                                                                                                                                                                                                                                                                                                                                                                                                                                                                                                                                                                                                |                                                                                                                                                                                                                                                                                                                                                                                                                                                                                                                                                                                                                                                                                                                                                                                                                                                                                                                                                                                               |
|------------------------------------------------------------------------------------------------------------------------|-------------------------------------------------------------------------------------------------------------------------------------------------------------------------------------------------|--------------------------------------------------------------------------------------------------------------------------------------------------------------------------------------------------------------------------------------------------------------------------------------------------------------------------------------------------------------------------------------------------------------------------------------------------------------------------------------------------------------------------------------------------------------------------------------------------------------------------------------------------------------------------------------------------------------------------------------------------------------------------------------------------------------------------------------------------------------------------------------------------------------------------------------------------------------------------------------------------------------------------------|-----------------------------------------------------------------------------------------------------------------------------------------------------------------------------------------------------------------------------------------------------------------------------------------------------------------------------------------------------------------------------------------------------------------------------------------------------------------------------------------------------------------------------------------------------------------------------------------------------------------------------------------------------------------------------------------------------------------------------------------------------------------------------------------------------------------------------------------------------------------------------------------------------------------------------------------------------------------------------------------------|
|                                                                                                                        |                                                                                                                                                                                                 | <p><b>Facilitating and hindering factors:</b></p> <ul style="list-style-type: none"> <li>- Is the primary physician offer possibly more low-threshold?</li> <li>- What was perceived positively?</li> <li>- What was perceived negatively?</li> <li>- Suggestions for improvement? Wishes?</li> </ul>                                                                                                                                                                                                                                                                                                                                                                                                                                                                                                                                                                                                                                                                                                                          | <ul style="list-style-type: none"> <li>- What did you find particularly helpful in the context of the discussions with the doctor/physician (or with the medical assistant, if applicable)?</li> <li>- What did you find difficult?</li> <li>- What did you miss/what else would you have liked?</li> </ul>                                                                                                                                                                                                                                                                                                                                                                                                                                                                                                                                                                                                                                                                                   |
| <b>Main question b)</b>                                                                                                | <b>Storytelling Prompt</b>                                                                                                                                                                      | <b>Definition of leading questions</b>                                                                                                                                                                                                                                                                                                                                                                                                                                                                                                                                                                                                                                                                                                                                                                                                                                                                                                                                                                                         | <b>Concrete Inquiries</b>                                                                                                                                                                                                                                                                                                                                                                                                                                                                                                                                                                                                                                                                                                                                                                                                                                                                                                                                                                     |
| <p>Which aspects are mentioned with regard to <b>acceptance of the NET</b>?</p> <p>How do patients define success?</p> | <p>What has changed for you since you completed talk therapy? How are you doing today?</p> <p>Finally, open-ended question: What do you wish for the future in terms of your mental health?</p> | <p><b>Effectiveness of NET or changes since completion of therapy:</b></p> <ul style="list-style-type: none"> <li>- Has there been an overall change in QOL?</li> <li>- What is the course of physical recovery? (Control variable "somatic condition").</li> <li>- What is the course of psychological recovery?</li> <li>- Is the perception of suffering lower?</li> <li>- Question about the social environment</li> </ul> <p><b>Quality of memories:</b></p> <ul style="list-style-type: none"> <li>- What is the quality of memories of the intensive stay? Possibly fewer intrusions? Possibly fewer delusional-distorted memories? Possibly realistic classification?</li> <li>- Dealing with amnesia during therapy: e.g. reconstruction through ICU diary, patient records or similar. <ul style="list-style-type: none"> <li>- <b>Acceptance of NET</b>- Is the therapy perceived as helpful overall helpful.</li> <li>- Subjective assessment of the long-term effectiveness of the therapy</li> </ul> </li> </ul> | <p><b>Effectiveness of NET or changes since completion of therapy:</b></p> <ul style="list-style-type: none"> <li>- How are you doing today in terms of your physical health?</li> <li>- What in particular has contributed to your mental recovery?</li> <li>- What stood in the way of your recovery?</li> <li>- Has your daily life changed since therapy?</li> <li>- Are you supported by those around you?</li> </ul> <p><b>Quality of memories:</b></p> <ul style="list-style-type: none"> <li>- After completing therapy, do you continue to be haunted by distressing memories of the ICU stay? Or if yes: How do you deal with this? What impact does it have on your daily life?</li> <li>- Were you able to reconstruct the period of missing memories through therapy? <ul style="list-style-type: none"> <li>- Acceptance of NET:</li> <li>- Would you recommend the therapy to others?</li> <li>- What do you wish for your mental health in the future?</li> </ul> </li> </ul> |
